# Supplementary material for: Association of Diabetes, Comorbidities, and A1C With Functional Disability in Older Adults
Source: Oxford University Press journal article supplement (doi:10.2337/dc09-1597), 2010-02-25
Supplement: dc091597-sup-onlineappendix.pdf [file dc091597-sup-onlineappendix.pdf]

**Appendix Table 1: Nationally representative odds ratios for the association of diabetes, hemoglobin A1c, diabetes duration, demographics, and selected comorbidities with disability\* among older adults in fully adjusted models,§ NHANES 1999 - 2004**

| Covariate                                  | LEM                | GPA                 | ADL                | IADL               | LAS                |
|--------------------------------------------|--------------------|---------------------|--------------------|--------------------|--------------------|
| Diabetes                                   | 0.90 (0.62 – 1.29) | 1.20 (0.81 – 1.77)  | 1.33 (0.84 – 2.09) | 1.08 (0.76 – 1.54) | 1.11 (0.79 – 1.56) |
| <i>Demographics</i>                        |                    |                     |                    |                    |                    |
| Age <sup>†</sup>                           | 1.44 (1.27 – 1.63) | 1.38 (1.20 – 1.58)  | 1.01 (0.87 – 1.18) | 1.12 (0.97 – 1.30) | 1.10 (0.92 – 1.32) |
| Sex                                        |                    |                     |                    |                    |                    |
| Male                                       | Reference          | Reference:          | Reference          | Reference          | Reference          |
| Female                                     | 2.61 (1.98 – 3.45) | 2.33 (1.71 – 3.17)  | 1.17 (0.91 – 1.51) | 3.22 (2.32 – 4.46) | 2.25 (1.55 – 3.27) |
| Ethnicity                                  |                    |                     |                    |                    |                    |
| White                                      | Reference          | Reference           | Reference          | Reference          | Reference          |
| Black                                      | 1.55 (1.28 – 1.90) | 1.01 (0.80 – 1.28)  | 1.28 (0.95 – 1.72) | 1.23 (0.96 – 1.58) | 1.33 (0.98 – 1.79) |
| Mexican American                           | 1.09 (0.81 – 1.46) | 1.22 (0.93 – 1.62)  | 1.79 (1.30 – 2.48) | 1.19 (0.89 – 1.61) | 1.64 (1.23 – 2.17) |
| Highest education level                    |                    |                     |                    |                    |                    |
| More than high school                      | Reference          | Reference           | Reference          | Reference          | Reference          |
| High school                                | 1.14 (0.94 – 1.38) | 0.96 (0.77 – 1.21)  | 1.04 (0.79 – 1.37) | 0.91 (0.68 – 1.21) | 0.82 (0.62 – 1.09) |
| Less than high school                      | 1.47 (1.11 – 1.93) | 0.93 (0.75 – 1.15)  | 1.13 (0.84 – 1.52) | 1.75 (1.36 – 2.26) | 1.26 (0.98 – 1.62) |
| Smoking                                    |                    |                     |                    |                    |                    |
| Never                                      | Reference          | Reference           | Reference          | Reference          | Reference          |
| Former                                     | 1.12 (0.95 – 1.32) | 1.15 (1.00 – 1.33)  | 0.88 (0.70 – 1.10) | 0.92 (0.75 – 1.13) | 0.84 (0.61 – 1.14) |
| Current                                    | 1.77 (1.28 – 2.45) | 1.33 (0.97 – 1.82)  | 1.10 (0.77 – 1.58) | 1.07 (0.70 – 1.63) | 1.51 (1.01 – 2.24) |
| <i>Metabolic Status</i>                    |                    |                     |                    |                    |                    |
| Hemoglobin A1c (per %)                     | 1.01 (0.90 – 1.13) | 1.01 (0.91 – 1.13)  | 1.04 (0.93 – 1.16) | 0.96 (0.86 – 1.08) | 1.00 (0.87 – 1.14) |
| <b>Diabetes duration</b> <sup>†</sup>      | 1.12 (0.96 – 1.30) | 0.95 (0.83 – 1.08)  | 1.09 (0.94 – 1.26) | 1.17 (1.00 – 1.37) | 1.04 (0.88 – 1.25) |
| Waist circumference                        | 1.03 (1.02 – 1.04) | 1.02 (1.01 – 1.03)  | 1.02 (1.01 – 1.04) | 1.02 (1.01 – 1.03) | 1.02 (1.01 – 1.03) |
| <i>Selected Comorbidities</i>              |                    |                     |                    |                    |                    |
| Obesity (BMI $\geq$ 30 kg/m <sup>2</sup> ) | 1.21 (0.94 – 1.56) | 1.18 (0.89 – 1.57)  | 1.16 (0.80 – 1.68) | 1.06 (0.79 – 1.41) | 1.37 (1.01 – 1.85) |
| Congestive heart failure                   | 2.26 (1.45 – 3.53) | 1.40 (0.86 – 2.28)  | 1.66 (1.14 – 2.41) | 2.23 (1.43 – 3.47) | 1.62 (1.01 – 2.60) |
| <b>CHD</b>                                 | 1.36 (1.04 – 1.77) | 1.27 (0.99 – 1.64)  | 0.98 (0.69 – 1.39) | 1.16 (0.88 – 1.53) | 1.56 (1.14 – 2.13) |
| <b>Stroke</b>                              | 1.08 (0.79 – 1.48) | 1.24 (0.86 – 2.28)  | 1.06 (0.72 – 1.56) | 1.16 (0.77 – 1.77) | 1.15 (0.82 – 1.61) |
| Hypertension                               | 1.50 (1.24 – 1.81) | 1.37 (1.14 – 1.65)  | 1.20 (0.98 – 1.48) | 1.22 (0.82 – 1.18) | 1.42 (1.12 – 1.80) |
| Leg ulcer or amputation                    | 1.85 (1.16 – 2.96) | 1.94 (1.17 – 3.21)  | 1.50 (0.93 – 2.42) | 1.81 (1.10 – 2.98) | 3.11 (2.00 – 4.86) |
| Visual impairment                          | 1.80 (1.46 – 2.22) | 2.44 (1.87 – 3.17)  | 2.09 (1.70 – 2.58) | 1.92 (1.45 – 2.56) | 2.27 (1.85 – 2.78) |
| Arthritis                                  | 2.44 (2.00 – 2.98) | 3.12 (2.54 – 3.82)  | 2.70 (2.19 – 3.33) | 2.16 (1.80 – 2.59) | 2.45 (1.96 – 3.07) |
| Hip fracture                               | 3.72 (2.02 – 6.84) | 4.66 (1.90 – 11.41) | 3.62 (1.95 – 6.74) | 2.98 (1.55 – 5.73) | 3.02 (1.56 – 5.83) |
| COPD                                       | 2.10 (1.50 – 2.94) | 1.46 (1.01 – 2.10)  | 1.74 (1.29 – 2.35) | 2.04 (1.52 – 2.74) | 1.68 (1.21 – 2.35) |
| Hearing impairment                         | 1.73 (1.52 – 1.98) | 1.86 (1.57 – 2.19)  | 1.65 (1.32 – 2.05) | 1.63 (1.32 – 2.02) | 1.62 (1.30 – 2.02) |
| Memory problems                            | 2.87 (2.14 – 3.87) | 3.03 (2.14 – 4.27)  | 2.78 (2.12 – 3.64) | 3.69 (2.64 – 5.16) | 3.38 (2.51 – 4.55) |

\* At least one task in specified functional group was answered as “some difficulty”, “much difficulty” or “unable”.

§ As described in model 5 of Table 2

† For each increase in 10 years

**Online Appendix Figure 1: Nationally representative prevalence of functional disability among older adults with and without diabetes, NHANES 1999 – 2006**

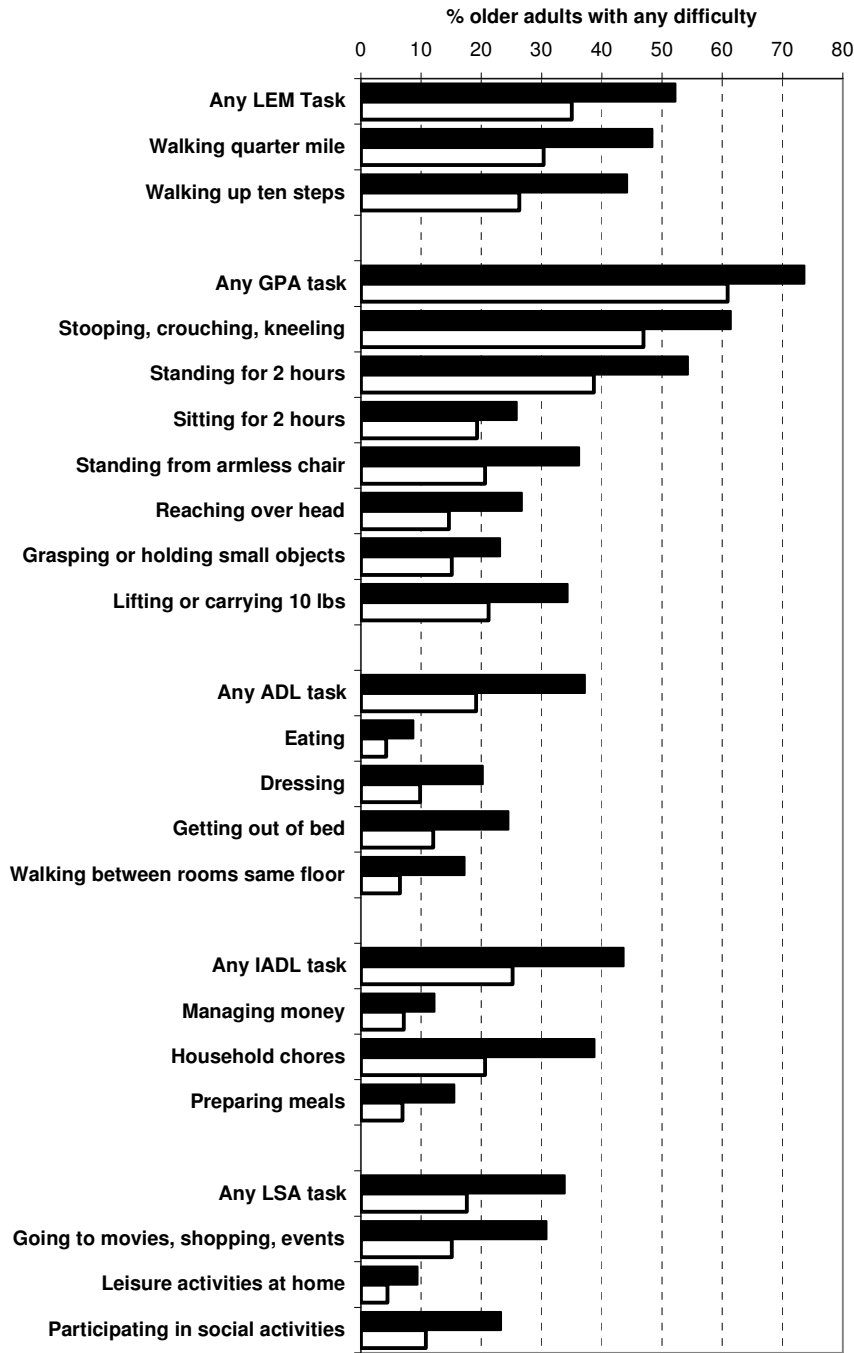

Prevalence of disability among older adults with diabetes (black) compared to those without diabetes (white), by functional group.
